# Supplementary material for: A comparative assessment of PM2.5exposures in light-rail, subway, freeway, and surface street environments in Los Angeles and estimated lung cancer risk
Source: Royal Society of Chemistry journal article supplement (doi:10.1039/c2em30495c), 2012-12-04
Supplement: c2em30495c.pdf [file c2em30495c.pdf]

|                                                     | USC METRO |       | USC on-road |       |                                 | USC METRO |   | USC on-road |       |
|-----------------------------------------------------|-----------|-------|-------------|-------|---------------------------------|-----------|---|-------------|-------|
|                                                     | average   | ±     | average     | ±     |                                 | average   | ± | average     | ±     |
| <i>Metals and trace elements (ng/m<sup>3</sup>)</i> |           |       |             |       | <i>PAHs* (ng/m<sup>3</sup>)</i> |           |   |             |       |
| Na                                                  | 780.5     | 289.6 | 591.5       | 46.2  | Pyrene                          | 0.05      | - | 0.04        | 0.01  |
| Mg                                                  | 76.3      | 6.6   | 67.5        | 3.6   | Benzo( <i>ghi</i> )fluoranthene | 0.04      | - | bdl         | bdl   |
| Al                                                  | 133.3     | 14.3  | 140.9       | 9.7   | Benzo( <i>a</i> )anthracene     | 0.03      | - | 0.01        | 0.00  |
| S                                                   | 1412.4    | 188.9 | 598.6       | 38.7  | Chrysene                        | 0.18      | - | 0.05        | 0.005 |
| K                                                   | 95.3      | 10.4  | 87.6        | 9.3   | Benzo( <i>b</i> )fluoranthene   | 0.11      | - | 0.09        | 0.08  |
| Ca                                                  | 144.6     | 30.8  | 125.4       | 7.4   | Benzo( <i>k</i> )fluoranthene   | 0.05      | - | 0.02        | 0.01  |
| Ti                                                  | 18.3      | 1.3   | 16.3        | 1.0   | Benzo( <i>e</i> )pyrene         | 0.08      | - | 0.05        | 0.06  |
| Cr                                                  | 3.1       | 2.2   | 2.8         | 0.1   | Benzo( <i>a</i> )pyrene         | bdl       | - | bdl         | bdl   |
| Mn                                                  | 5.2       | 0.8   | 4.8         | 0.2   | Indeno(1,2,3- <i>cd</i> )pyrene | 0.05      | - | 0.03        | 0.002 |
| Fe                                                  | 236.8     | 8.1   | 271.2       | 12.0  | Benzo( <i>ghi</i> )perylene     | 0.11      | - | 0.14        | 0.05  |
| Co                                                  | 0.12      | 0.0   | 0.16        | 0.0   | Coronene                        | 0.06      | - | 0.02        | 0.01  |
| Ni                                                  | 2.9       | 1.5   | 1.6         | 0.2   |                                 |           |   |             |       |
| Cu                                                  | 14.6      | 0.9   | 13.9        | 0.5   |                                 |           |   |             |       |
| Zn                                                  | 16.3      | 3.62  | 14.3        | 1.16  |                                 |           |   |             |       |
| Mo                                                  | 1.06      | 0.1   | 0.80        | 0.1   |                                 |           |   |             |       |
| Cd                                                  | 0.09      | 0.0   | 0.09        | 0.0   |                                 |           |   |             |       |
| Sn                                                  | 3.5       | 0.6   | 3.7         | 0.1   |                                 |           |   |             |       |
| Sb                                                  | 2.4       | 0.55  | 2.4         | 0.09  |                                 |           |   |             |       |
| Ba                                                  | 13.5      | 0.9   | 14.9        | 0.8   |                                 |           |   |             |       |
| Eu                                                  | 0.011     | 0.001 | 0.021       | 0.001 |                                 |           |   |             |       |
| Pb                                                  | 2.9       | 0.0   | 4.3         | 0.2   |                                 |           |   |             |       |

bdl denotes below detection limit

\*only one sample analyzed for USC METRO for PAHs

Table S1. Average concentrations of metals and trace elements and PAHs at USC site during the two campaigns. (N=2)

|                  | Dates of sampling | Sampling times  | Temperature (°C) | RH (%)      | Prevailing wind direction | Wind speed (m/s) | NO <sub>x</sub> (ppm) | CO (ppm)    |
|------------------|-------------------|-----------------|------------------|-------------|---------------------------|------------------|-----------------------|-------------|
| METRO campaign   | 5/3-8/13/10       | 9:30am - 1:00pm | 24.0 ± 3.5       | 55 ± 9.7    | SW                        | 3.2 ± 0.9        | 0.035 ± 0.016         | 0.47 ± 0.14 |
| on-road campaign | 3/1-5/2/11        | 6:00am - 5:00pm | 19.8 ± 8.1       | 53.0 ± 35.1 | W                         | 3.3 ± 2.4        | 0.043 ± 0.043         | 0.58 ± 0.32 |
| p-value (α=0.05) | -                 | -               | 0.25             | 0.82        | -                         | 0.22             | 0.61                  | 0.28        |

Table S2. Meteorological parameters and gaseous pollutant measurements at South Coast Air Quality Management District (SCAQMD) monitoring site in downtown Los Angeles.

|                                                     | 110   | ±    | 710   | ±    | Wilshire/<br>Sunset | ±     | METRO<br>Gold line | ±     | METRO<br>Red line | ±      |
|-----------------------------------------------------|-------|------|-------|------|---------------------|-------|--------------------|-------|-------------------|--------|
| <i>PM components (µg/m<sup>3</sup>)</i>             |       |      |       |      |                     |       |                    |       |                   |        |
| OC                                                  | 5.0   | 0.6  | 6.3   | 1.3  | 5.2                 | 0.3   | 4.0                | 0.1   | 4.4               | 0.2    |
| WSOC                                                | 1.6   | 0.01 | 1.4   | 0.1  | 2.0                 | 0.2   | 1.8                | -     | 1.2               | 0.1    |
| EC                                                  | 1.0   | 0.2  | 2.0   | 0.2  | 0.6                 | 0.01  | 1.0                | 0.2   | 0.8               | 0.01   |
| TC                                                  | 6.1   | 0.7  | 8.3   | 1.3  | 5.8                 | 0.3   | 5.1                | 0.2   | 5.2               | 0.2    |
| <i>metals and trace elements (ng/m<sup>3</sup>)</i> |       |      |       |      |                     |       |                    |       |                   |        |
| Fe                                                  | 955.6 | 43.6 | 865.7 | 42.0 | 666.8               | 30.8  | 490.5              | 195.1 | 10599.2           | 1723.7 |
| Na                                                  | 480.9 | 37.2 | 400.7 | 31.2 | 660.1               | 50.7  | 212.5              | 3.2   | 288.0             | 130.8  |
| Mg                                                  | 98.9  | 5.3  | 86.4  | 5.0  | 103.5               | 5.8   | 30.6               | 20.7  | 63.7              | 29.5   |
| Al                                                  | 197.4 | 12.6 | 182.2 | 11.7 | 170.3               | 11.1  | 61.7               | 54.6  | 150.8             | 47.5   |
| S                                                   | 601.3 | 38.3 | 423.0 | 27.3 | 432.1               | 28.0  | 601.2              | 359.8 | 802.1             | 123.1  |
| K                                                   | 117.5 | 12.5 | 89.2  | 9.4  | 101.3               | 11.8  | 57.6               | 10.0  | 62.1              | 12.0   |
| Ca                                                  | 220.6 | 12.9 | 209.5 | 12.8 | 194.7               | 11.6  | 74.2               | 39.4  | 189.5             | 61.2   |
| Mn                                                  | 10.0  | 0.4  | 9.2   | 0.4  | 7.4                 | 0.3   | 5.8                | 2.2   | 84.9              | 13.1   |
| Mo                                                  | 2.6   | 0.2  | 2.2   | 0.1  | 2.3                 | 0.1   | 6.3                | 2.1   | 155.6             | 26.9   |
| Ba                                                  | 81.7  | 4.5  | 80.5  | 4.6  | 46.4                | 2.4   | 18.4               | 11.5  | 215.6             | 33.3   |
| Ti                                                  | 46.5  | 2.5  | 34.4  | 1.9  | 28.1                | 1.6   | 9.4                | 3.0   | 11.8              | 2.8    |
| Cr                                                  | 4.1   | 0.2  | 3.4   | 0.2  | 3.3                 | 0.1   | 2.1                | 0.9   | 23.1              | 4.7    |
| Co                                                  | 0.2   | 0.0  | 0.2   | 0.01 | 0.2                 | 0.01  | 0.1                | 0.03  | 1.2               | 0.2    |
| Ni                                                  | 1.7   | 0.2  | 1.6   | 0.2  | 0.9                 | 0.2   | 1.4                | 0.5   | 11.9              | 2.6    |
| Cu                                                  | 60.4  | 2.2  | 36.8  | 1.4  | 43.3                | 1.5   | 37.5               | 2.5   | 64.8              | 11.3   |
| Zn                                                  | 29.7  | 2.4  | 24.2  | 1.9  | 20.5                | 1.6   | 23.9               | 5.5   | 29.7              | 2.6    |
| Cd                                                  | 0.2   | 0.0  | 0.1   | 0.0  | 0.1                 | 0.01  | 0.1                | 0.1   | 1.0               | 0.1    |
| Sn                                                  | 7.9   | 0.3  | 4.1   | 0.2  | 7.5                 | 0.3   | 3.3                | 1.4   | 4.0               | 0.4    |
| Sb                                                  | 10.5  | 0.4  | 6.5   | 0.3  | 7.1                 | 0.3   | 3.7                | 1.6   | 1.8               | 0.7    |
| Eu                                                  | 0.1   | 0.01 | 0.1   | 0.01 | 0.1                 | 0.003 | 0.01               | 0.01  | 0.1               | 0.02   |
| Pb                                                  | 4.7   | 0.3  | 4.0   | 0.2  | 4.9                 | 0.3   | 2.4                | 1.1   | 2.9               | 0.4    |
| <i>PAHs (ng/m<sup>3</sup>)</i>                      |       |      |       |      |                     |       |                    |       |                   |        |
| Pyrene                                              | 0.21  | 0.02 | 0.83  | 0.10 | 0.13                | 0.05  | 0.06               | -     | 0.08              | 0.01   |
| Benzo(GH)fluoranthene                               | 0.22  | 0.04 | 0.32  | 0.09 | 0.24                | 0.24  | bdl                | -     | 0.06              | 0.00   |
| Benzo(a)anthracene                                  | 0.10  | 0.03 | 0.16  | 0.06 | 0.06                | 0.02  | bdl                | -     | 0.02              | 0.00   |
| Chrysene                                            | 0.23  | 0.06 | 0.25  | 0.07 | 0.14                | 0.01  | 0.14               | -     | 0.19              | 0.02   |
| Benzo(b)fluoranthene                                | 0.31  | 0.05 | 0.30  | 0.09 | 0.23                | 0.07  | 0.10               | -     | 0.12              | 0.01   |
| Benzo(k)fluoranthene                                | 0.10  | 0.01 | 0.10  | 0.07 | 0.05                | 0.02  | 0.05               | -     | 0.04              | 0.00   |
| Benzo(e)pyrene                                      | 0.21  | 0.01 | 0.24  | 0.09 | 0.15                | 0.05  | 0.04               | -     | 0.08              | 0.05   |
| Benzo(a)pyrene                                      | bdl   | -    | 0.09  | 0.05 | bdl                 | -     | bdl                | -     | bdl               | -      |
| Indeno(1,2,3-cd)pyrene                              | 0.09  | 0.06 | 0.04  | 0.01 | 0.09                | 0.09  | 0.06               | -     | 0.05              | 0.00   |
| Benzo(GH)perylene                                   | 0.45  | 0.10 | 0.51  | 0.16 | 0.30                | 0.10  | 0.12               | -     | 0.10              | 0.00   |
| Coronene                                            | 0.10  | 0.10 | 0.17  | 0.14 | 0.17                | 0.03  | 0.06               | -     | 0.06              | 0.01   |

Table S3. Mass concentrations of major PM components, metals and trace elements, and PAHs at the five microenvironments (N=2). Only one sample for PAHs was analyzed for the METRO gold line.
